# Supplementary material for: Measurement of Outflow Facility Using iPerfusion
Source: PubMed Central journal article supplement (PMC4780770; doi:10.1371/journal.pone.0150694), 2016-03-07
Supplement: pone.0150694.s003.pdf [file pone.0150694.s003.pdf]

# Measurement of Outflow Facility using *iPerfusion*

Joseph M. Sherwood, Ester Reina-Torres, Jacques Bertrand, Barnaby Rowe, Darryl R. Overby

## Supporting Information 3: Nomenclature

This Supporting Information provides a list of all variables and parameters used in the main text. Table 1 defines the subscripts, Table 2 describes the main terms used in the paper, and Table 3 provides a list of sources of uncertainty and measures of spread.

### S3-1 Subscripts

We use several subscripts to categorise variables, which are listed in Table 1.

**Table 1:** Subscripts

|     |                                                            |
|-----|------------------------------------------------------------|
| 1   | the control eye of a pair                                  |
| 2   | the treated eye of a pair                                  |
| $A$ | the control population                                     |
| $B$ | the treated population                                     |
| $i$ | an index representing a given eye                          |
| $j$ | an index representing a given pressure step                |
| $p$ | an index representing a given pair of eyes                 |
| $r$ | reference: $C_r$ is calculated at reference pressure $P_r$ |

### S3-2 General nomenclature

Variables are listed in alphabetical order, with the exception of confidence intervals,  $CI$ , which follow the variable that they apply to.

| Symbol              | Units         | Meaning                                                                                                                                                                                                                                                                                                         |
|---------------------|---------------|-----------------------------------------------------------------------------------------------------------------------------------------------------------------------------------------------------------------------------------------------------------------------------------------------------------------|
| $\beta$             | –             | Non-linearity parameter in the power-law model for the flow-pressure and facility-pressure relationships (Equations 9 and 11): positive values indicate a pressure dependent increase in facility and negative values indicate a pressure dependent decrease                                                    |
| $C$                 | $nl/min/mmHg$ | Total outflow facility, or simply ‘facility’, comprising both conventional outflow and any pressure-dependent components of unconventional outflow and AH secretion (pseudofacility), also used for the hydrodynamic conductance of the capillaries in the <i>in vitro</i> tests, as these values are analogous |
| $C_{lin}$           | $nl/min/mmHg$ | Facility when calculated assuming a linear $Q$ - $P$ relationship, implying a facility that is independent of pressure                                                                                                                                                                                          |
| $\bar{C}^*$         | $nl/min/mmHg$ | Weighted geometric mean of facility for a given population sample                                                                                                                                                                                                                                               |
| $ME_{\bar{C}^*},95$ | -             | Margin of error on average facility                                                                                                                                                                                                                                                                             |
| $C_q$               | $nl/min/mmHg$ | Hydrodynamic conductance of the flow sensor                                                                                                                                                                                                                                                                     |
| $C_r$               | $nl/min/mmHg$ | Reference facility: the value of $C$ at reference pressure $P_r$                                                                                                                                                                                                                                                |
| $D$                 | $mm$          | Internal diameter of inlet reservoir used in perfusion system                                                                                                                                                                                                                                                   |
| $\bar{D}^*$         | –             | Average fold change in facility                                                                                                                                                                                                                                                                                 |
| $ME_{\bar{D}^*},95$ | -             | Margin of error on fold change in facility                                                                                                                                                                                                                                                                      |
| $\Delta P_q$        | $mmHg$        | Pressure drop across flow sensor                                                                                                                                                                                                                                                                                |
| $g$                 | $m/s^2$       | Gravitational acceleration, $9.81 m/s^2$                                                                                                                                                                                                                                                                        |
| $\Gamma$            | $nl/min/mmHg$ | Instantaneous ratio of measured flow and pressure $\Gamma(t) = Q(t)/P(t)$ : $\Gamma = C$ when the system reaches steady state                                                                                                                                                                                   |
| $h_b$               | $m$           | Height of the fluid surface in the inlet reservoir relative to that in the eye bath: see Figure 1a                                                                                                                                                                                                              |
| $h_r$               | $m$           | Submersion depth of the eye: see Figure 1a                                                                                                                                                                                                                                                                      |
| $i$                 | –             | Index for a given eye                                                                                                                                                                                                                                                                                           |
| $j$                 | –             | Index for a given pressure step                                                                                                                                                                                                                                                                                 |
| $L_c$               | $m$           | Length of glass capillary used for an <i>in vitro</i> test                                                                                                                                                                                                                                                      |

|                     |                     |                                                                                                                       |
|---------------------|---------------------|-----------------------------------------------------------------------------------------------------------------------|
| $m$                 | $kg$                | Mass of the fluid in the inlet reservoir                                                                              |
| $ME_{95}$           | -                   | Margin of error corresponding to the half-width of the 95% confidence interval                                        |
| $N$                 | -                   | Number of eyes in an unpaired population sample                                                                       |
| $\nu$               | -                   | Number of degrees of freedom                                                                                          |
| $p$                 | -                   | Index for a given pair of eyes                                                                                        |
| $P$                 | $mmHg$              | Instantaneous pressure drop across the outflow pathway                                                                |
| $P_a$               | $mmHg$              | Applied pressure drop across the system, equal to $\rho gh_r$ , related to $P$ by Equation 5                          |
| $P_e$               | $mmHg$              | Pressure in the episcleral vessels                                                                                    |
| $P_j$               | $mmHg$              | Average pressure, $P$ at steady state for a given pressure step                                                       |
| $P_r$               | $mmHg$              | Reference pressure: selected pressure at which to evaluate $C_r$                                                      |
| $P_I, P_{II}$       | $mmHg$              | Measured pressures at two pressure steps I and II, as used in the 'two-step' perfusion protocol (Equation 2)          |
| $\Psi$              | -                   | Number of pairs of eyes in a sample                                                                                   |
| $\Psi_{con}$        | -                   | Number of pairs of eyes of untreated eyes for the estimation of $s_{con}^2$                                           |
| $Q$                 | $nl/min$            | Instantaneous flow rate into the eye from the perfusion system                                                        |
| $Q_j$               | $nl/min$            | Average flow rate at steady state for a given pressure step                                                           |
| $Q_0$               | $nl/min$            | Pressure independent outflow: the total outflow when the pressure drop across the pressure dependent pathways is zero |
| $Q_I, Q_{II}$       | $nl/min$            | Measured flow rates at two pressure steps I and II, as used in the 'two-step' perfusion protocol (Equation 2)         |
| $r$                 | -                   | Pearson's product moment correlation coefficient                                                                      |
| $R_L$               | $mmHg/\mu l/min/mm$ | Resistance per unit length of glass capillary used for <i>in vitro</i> testing                                        |
| $R_0$               | $mmHg/\mu l/min$    | Resistance of the perfusion system downstream of the flow sensor                                                      |
| $\rho$              | $kg/m^3$            | Fluid density                                                                                                         |
| $Y$                 | -                   | Log-transformed facility, $Y = \ln(C)$                                                                                |
| $\bar{Y}$           | -                   | Weighted mean log-transformed facility for a population sample                                                        |
| $ME_{\bar{Y}^*,95}$ | -                   | Margin of error on average log transformed facility                                                                   |

|                   |   |                                                                                       |
|-------------------|---|---------------------------------------------------------------------------------------|
| $Z_p$             | – | Difference in log-transformed facility between paired eyes, for pair $p$              |
| $\bar{Z}$         | – | Weighted mean difference between treated and control eyes for a sample of paired eyes |
| $ME_{\bar{Z},95}$ | - | Margin of error on average change in log transformed facility                         |

### S3-3 Uncertainties and measures of spread

In this section we describe uncertainties and measures of spread (MOS). Uncertainties are defined as ambiguities or potential variabilities in the *measurements* due to error, noise or lack of certainty that affect the results and propagate throughout the analysis. MOS are defined as endpoint descriptive statistics used to summarise the variability, predicted range or confidence for a *sample*.

A distinction should be made between ‘arithmetic’ or normal variables, and ‘geometric’ or lognormal variables. The arithmetic variables are all provided in the form  $s^2$ , indicating a variance, which allows addition in order to combine sources of uncertainty. For geometric variables, denoted with \*, we provide the geometric standard deviations  $s^*$ . All values are dimensionless unless indicated.

| Symbol                  | Applies to                          | Meaning                                                                                                                                                                  |
|-------------------------|-------------------------------------|--------------------------------------------------------------------------------------------------------------------------------------------------------------------------|
| $s_{\text{con}}^2$      | Paired eyes from a given population | Intra-individual uncertainty in $Z$ : comprises tissue variability between paired eyes and uncertainty associated with interfacing the eye with the perfusion system     |
| $s_C^*$                 | MOS: Sample of eyes                 | Geometric standard deviation in facility for a given population                                                                                                          |
| $s_{\bar{C}}^*$         | MOS: Sample of eyes                 | Geometric standard deviation on the geometric mean facility for a given population, could be interpreted as the standard error on the geometric mean                     |
| $s_{\text{dif}}^2$      | A sample of paired eyes             | Total variability in the differences in log-facilities for paired data: the unweighted variance of $Z_p$                                                                 |
| $s_D^*$                 | MOS: Paired/Unpaired comparison     | Geometric standard deviation of fold change between two populations                                                                                                      |
| $s_{Q_{\text{ave}}}^2$  | Pressure step, $j$                  | Uncertainty in flow rate due to averaging a noisy signal, units: $(nl/min)^2$                                                                                            |
| $s_{Q_{\text{sens}}}^2$ | A given flow ensor                  | Uncertainty in flow rate due to sensor uncertainty, units: $(nl/min)^2$                                                                                                  |
| $s_{Q,j}^2$             | Pressure step, $j$                  | Uncertainty in flow rate for a given pressure step $j$ , due to averaging a noisy signal and sensor uncertainty, units: $(nl/min)^2$                                     |
| $s_{P,j}^2$             | Pressure step, $j$                  | Uncertainty in pressure for a given pressure step $j$ , due to averaging a noisy signal and sensor uncertainty, negligibly small for the present system, units: $mmHg^2$ |

|                               |                                               |                                                                                                                                                                                                 |
|-------------------------------|-----------------------------------------------|-------------------------------------------------------------------------------------------------------------------------------------------------------------------------------------------------|
| $s_{\text{pop}}^2$            | A sample of unpaired eyes                     | Inter-individual uncertainty in $Y$ : comprises tissue variability between unpaired eyes from the same population and uncertainty associated with interfacing the eye with the perfusion system |
| $s_{\text{reg},i}^2$          | A single eye, $i$                             | Uncertainty in log facility for a given eye, $i$ , arising from regression fitting of model to $Q - P$ data, assumed to be equal to the 68% confidence interval on $Y$                          |
| $\overline{s_{\text{reg}}^2}$ | A sample of eyes                              | Unweighted mean of $s_{\text{reg},i}^2$ for a given sample                                                                                                                                      |
| $s_{\text{tot}}^2$            | A sample of unpaired eyes                     | Total unweighted variance in log-facility for a given population sample: the unweighted variance of $Y_i$                                                                                       |
| $s_{\text{tot},Z}^2$          | A sample of paired eyes                       | Total unweighted variance in difference in log-facility for a sample of paired eyes: the unweighted variance of $Z_p$                                                                           |
| $s_{\text{tre}}^2$            | Sample of treated paired or unpaired eyes     | Additional uncertainty in $Z$ arising from variable effects of the treatment                                                                                                                    |
| $s_{\text{tre}}^*$            | MOS: Paired/Unpaired comparison               | Geometric standard deviation of fold change due to treatment variability                                                                                                                        |
| $s_Z^2$                       | MOS: Paired/Unpaired comparison in log domain | Unbiased weighted variance of $Z$                                                                                                                                                               |
| $s_{\overline{Z}}^2$          | MOS: Paired/Unpaired comparison in log domain | Unbiased variance of $\overline{Z}$ , qualitatively comparable to the square of the standard error on the weighted mean of $Z$                                                                  |
| $s_Y^2$                       | MOS: Sample of unpaired eyes                  | Unbiased weighted variance of $Y$                                                                                                                                                               |
| $s_{\overline{Y}}^2$          | MOS: Sample of unpaired eyes                  | Unbiased variance of $\overline{Y}$ , qualitatively comparable to the square of the standard error on the weighted mean of $Y$                                                                  |
